# Supplementary material
Source: PubMed Central journal article supplement (PMC7832159)
Supplement: mmc1.pdf [file mmc1.pdf]

# THE LANCET

## Healthy Longevity

### Supplementary appendix

This appendix formed part of the original submission and has been peer reviewed. We post it as supplied by the authors.

Supplement to: Yang H, Chen W, Hu Y, et al. Pre-pandemic psychiatric disorders and risk of COVID-19: a UK Biobank cohort analysis. *Lancet Healthy Longev* 2020; published online Oct 26. [https://doi.org/10.1016/S2666-7568\(20\)30013-1](https://doi.org/10.1016/S2666-7568(20)30013-1).

**Supplementary Table 1. International Classification of Disease (ICD) codes, ninth (ICD-9) and tenth (ICD-10) revisions for diagnoses used in this study**

|                              |                           | ICD-10                                                                                                                                                                                                                                                                                                                       | ICD-9                                                                  |
|------------------------------|---------------------------|------------------------------------------------------------------------------------------------------------------------------------------------------------------------------------------------------------------------------------------------------------------------------------------------------------------------------|------------------------------------------------------------------------|
| <b>Psychiatric disorders</b> | Any                       | F10-F29, F32-F33, F40-F41, F43                                                                                                                                                                                                                                                                                               | 291, 295, 296.1, 297, 298, 300.0, 300.2, 300.4, 303-305, 308, 309, 311 |
|                              | Depression                | F32-F33                                                                                                                                                                                                                                                                                                                      | 296.1, 300.4, 311                                                      |
|                              | Anxiety                   | F40-F41                                                                                                                                                                                                                                                                                                                      | 300.0, 300.2                                                           |
|                              | Stress-related disorder   | F43                                                                                                                                                                                                                                                                                                                          | 308, 309                                                               |
|                              | Substance misuse          | F10-F19                                                                                                                                                                                                                                                                                                                      | 291, 303-305                                                           |
|                              | Psychotic disorder        | F20-F29                                                                                                                                                                                                                                                                                                                      | 295, 297, 298                                                          |
| <b>COVID-19</b>              | -                         | U07.1, U07.2                                                                                                                                                                                                                                                                                                                 | -                                                                      |
| <b>Other infections</b>      | -                         | A, B, I30.0, I30.1, I33, I38-I39, I40.0, G00-08, J00-J06, J09-J22, J32, J35.0, J37.0, J37.1, J37.2, J40-J42, H60, H65-H67, H70, N10-N12, N13.6, N15.1, N15.9, N30, N34.0, N39.0, N41.0, N41.1-N41.3, N43.1, N45, N48.1, N48.2, N49, N61, N70-N76, N77.1, K29, K35-K37, L01-L08, M00, M01, M46, M60.0, M65, M71.0, M71.1, M86 | -                                                                      |
| <b>Somatic comorbidities</b> | Chronic cardiac disease   | G45, G46, I11.0, I13.0, I13.2, I21, I22, I25.2, I50, I60-I71, I73.1, I73.8, I73.9, I77.1, I79.0, I79.2, K55.1, K55.8, K55.9, R02, Z95.8, Z95.9                                                                                                                                                                               | 410, 412, 430-438, 440, 441, 4280, 4439, 7854, V434                    |
|                              | Diabetes                  | E10.9, E11.9, E12.9, E13.9, E14.9                                                                                                                                                                                                                                                                                            | 2500                                                                   |
|                              | Chronic pulmonary disease | J40-J44, J46, J47, J60-67, J70, J684, J841, J920, J96.1, J98.2,                                                                                                                                                                                                                                                              | 490-492, 494-496, 500-505                                              |
|                              | Chronic kidney disease    | I20, I13.1, N03.2-N03.7, N05.2-N05.7, N18, N19, N25.0, Z94.0, Z99.2                                                                                                                                                                                                                                                          | 582, 583, 585, 586, 588, V420, V56                                     |
|                              | Asthma                    | J45                                                                                                                                                                                                                                                                                                                          | 493, V175                                                              |

**Supplementary Table 2. Risk of COVID-19 among individuals with pre-pandemic psychiatric disorders, by different adjustment strategies, compared with that of individuals without such conditions**

| Model information                                                                                                                                            | All COVID-19                                        |                                                        |                  | Inpatient COVID-19                                  |                                                        |                  | COVID-19-related deaths                             |                                                        |                  |
|--------------------------------------------------------------------------------------------------------------------------------------------------------------|-----------------------------------------------------|--------------------------------------------------------|------------------|-----------------------------------------------------|--------------------------------------------------------|------------------|-----------------------------------------------------|--------------------------------------------------------|------------------|
|                                                                                                                                                              | Individuals with pre-pandemic psychiatric disorders | Individuals without pre-pandemic psychiatric disorders | OR (95% CI)      | Individuals with pre-pandemic psychiatric disorders | Individuals without pre-pandemic psychiatric disorders | OR (95% CI)      | Individuals with pre-pandemic psychiatric disorders | Individuals without pre-pandemic psychiatric disorders | OR (95% CI)      |
| <b>Model 1:</b> adjusted for birth year, sex                                                                                                                 |                                                     |                                                        | 2.16 (1.94-2.40) |                                                     |                                                        | 2.46 (2.17-2.78) |                                                     |                                                        | 3.44 (2.77-4.27) |
| <b>Model 2:</b> Model 1+ sociodemographic factors (i.e., race or ethnicity, Townsend deprivation index, educational attainment, and annual household income) | 442/50809<br>(0.87%)                                | 1509/370205<br>(0.41%)                                 | 1.84 (1.65-2.06) | 338/50809<br>(0.67%)                                | 1012/370205<br>(0.27%)                                 | 2.08 (1.83-2.36) | 120/50809 (0.24%)                                   | 256/370205<br>(0.07%)                                  | 2.89 (2.31-3.61) |
| <b>Model 3:</b> Model 2+ body-mass index and smoking status                                                                                                  |                                                     |                                                        | 1.85 (1.65-2.07) |                                                     |                                                        | 2.04 (1.78-2.33) |                                                     |                                                        | 2.71 (2.14-3.42) |
| <b>Model 4:</b> Model 3+ history of chronic cardiac disease, diabetes, chronic pulmonary disease, chronic kidney disease, and asthma                         |                                                     |                                                        | 1.44 (1.28-1.62) |                                                     |                                                        | 1.55 (1.34-1.78) |                                                     |                                                        | 2.03 (1.59-2.59) |

Data are n/N (%), unless otherwise specified. ORs (95% CI) were derived from logistic regression models, adjusted for covariates listed in the model information column. OR=odds ratio.

**Supplementary Table 3 Sub-analysis for the association between any pre-pandemic psychiatric disorders, identified according to diagnosis from either UK Biobank inpatient data or primary care data, and COVID-19**

|                                           | All COVID-19                                        |                                                        |                  | Inpatient COVID-19                                  |                                                        |                  | COVID-19-related deaths                             |                                                        |                  |
|-------------------------------------------|-----------------------------------------------------|--------------------------------------------------------|------------------|-----------------------------------------------------|--------------------------------------------------------|------------------|-----------------------------------------------------|--------------------------------------------------------|------------------|
|                                           | Individuals with pre-pandemic psychiatric disorders | Individuals without pre-pandemic psychiatric disorders | OR (95% CI)      | Individuals with pre-pandemic psychiatric disorders | Individuals without pre-pandemic psychiatric disorders | OR (95% CI)      | Individuals with pre-pandemic psychiatric disorders | Individuals without pre-pandemic psychiatric disorders | OR (95% CI)      |
| Both inpatient and primary care diagnosis | 159/17417 (0.91%)                                   |                                                        | 1.95 (1.57-2.40) | 110/17417 (0.63%)                                   |                                                        | 1.96 (1.51-2.54) | 43/17417 (0.25%)                                    |                                                        | 2.96 (1.93-4.56) |
| Only inpatient diagnosis                  | 46/4791 (0.96%)                                     | 366/102093 (0.36%)                                     | 1.89 (1.38-2.59) | 36/4791 (0.75%)                                     | 235/102093 (0.23%)                                     | 2.11 (1.47-3.04) | 13/4791 (0.27%)                                     | 67/102093 (0.07%)                                      | 2.39 (1.30-4.41) |
| Only primary care diagnosis               | 282/54360 (0.52%)                                   |                                                        | 1.43 (1.22-1.68) | 182/54360 (0.33%)                                   |                                                        | 1.44 (1.18-1.76) | 50/54360 (0.09%)                                    |                                                        | 1.53 (1.05-2.22) |

Data are n/N (%), unless otherwise specified. ORs (95% CI) were derived from logistic regression models, adjusted for birth year, sex, race or ethnicity, Townsend deprivation index, educational attainment, annual household income, body-mass index, smoking status, and history of chronic cardiac disease, diabetes, chronic pulmonary disease, chronic kidney disease, and asthma. OR=odds ratio.

**Supplementary Table 4. Sensitivity analyses for the association between any or specific pre-pandemic psychiatric disorder, identified according to primary diagnosis of the UK Biobank inpatient hospital data, and COVID-19**

|                                 | All COVID-19                                        |                                                        |                  | Inpatient COVID-19                                  |                                                        |                  | COVID-19-related deaths                             |                                                        |                   |
|---------------------------------|-----------------------------------------------------|--------------------------------------------------------|------------------|-----------------------------------------------------|--------------------------------------------------------|------------------|-----------------------------------------------------|--------------------------------------------------------|-------------------|
|                                 | Individuals with pre-pandemic psychiatric disorders | Individuals without pre-pandemic psychiatric disorders | OR (95% CI)      | Individuals with pre-pandemic psychiatric disorders | Individuals without pre-pandemic psychiatric disorders | OR (95% CI)      | Individuals with pre-pandemic psychiatric disorders | Individuals without pre-pandemic psychiatric disorders | OR (95% CI)       |
| <b>Any psychiatric disorder</b> | 53/4366 (1.21%)                                     | 1898/416648 (0.46%)                                    | 1.66 (1.26-2.20) | 37/4366 (0.85%)                                     | 1313/416648 (0.32%)                                    | 1.59 (1.14-2.23) | 12/4366 (0.27%)                                     | 364/416648 (0.09%)                                     | 2.03 (1.13-3.65)  |
| <b>Depression</b>               | 20/1625 (1.23%)                                     | 1931/419389 (0.46%)                                    | 1.74 (1.11-2.72) | 13/1625 (0.80%)                                     | 1337/419389 (0.32%)                                    | 1.56 (0.90-2.72) | 3/1625 (0.18%)                                      | 373/419389 (0.09%)                                     | 1.33 (0.42-4.17)  |
| <b>Anxiety</b>                  | 11/865 (1.27%)                                      | 1940/420149 (0.46%)                                    | 1.78 (0.98-3.25) | 8/865 (0.92%)                                       | 1342/420149 (0.32%)                                    | 1.80 (0.89-3.64) | 2/865 (0.23%)                                       | 374/420149 (0.09%)                                     | 1.62 (0.40-6.56)  |
| <b>Stress-related disorder</b>  | 4/380 (1.05%)                                       | 1947/420634 (0.46%)                                    | 1.43 (0.53-3.88) | 3/380 (0.79%)                                       | 1347/420634 (0.32%)                                    | 1.52 (0.48-4.79) | 1/380 (0.26%)                                       | 375/420634 (0.09%)                                     | 2.36 (0.33-17.07) |
| <b>Substance misuse</b>         | 15/1239 (1.21%)                                     | 1936/419775 (0.46%)                                    | 1.45 (0.86-2.43) | 11/1239 (0.89%)                                     | 1339/419775 (0.32%)                                    | 1.42 (0.77-2.60) | 5/1239 (0.40%)                                      | 371/419775 (0.09%)                                     | 2.60 (1.06-6.40)  |
| <b>Psychotic disorder</b>       | 6/777 (0.77%)                                       | 1945/420237 (0.46%)                                    | 0.97 (0.43-2.17) | 4/777 (0.51%)                                       | 1346/420237 (0.32%)                                    | 0.89 (0.33-2.38) | 1/777 (0.13%)                                       | 375/420237 (0.09%)                                     | 0.94 (0.13-6.80)  |

Data are n/N (%), unless otherwise specified. ORs (95% CI) were derived from logistic regression models, adjusted for birth year, sex, race or ethnicity, Townsend deprivation index, educational attainment, annual household income, body-mass index, smoking status, and history of chronic cardiac disease, diabetes, chronic pulmonary disease, chronic kidney disease, and asthma. OR=odds ratio.

**Supplementary Table 5. Sensitivity analyses for the association between any or specific pre-pandemic psychiatric disorder and COVID-19 by restricting to the study period before April 27, 2020**

|                                 | All COVID-19                                        |                                                        | OR (95% CI)      | Inpatient COVID-19                                  |                                                        | OR (95% CI)      | COVID-19-related deaths                             |                                                        | OR (95% CI)      |
|---------------------------------|-----------------------------------------------------|--------------------------------------------------------|------------------|-----------------------------------------------------|--------------------------------------------------------|------------------|-----------------------------------------------------|--------------------------------------------------------|------------------|
|                                 | Individuals with pre-pandemic psychiatric disorders | Individuals without pre-pandemic psychiatric disorders |                  | Individuals with pre-pandemic psychiatric disorders | Individuals without pre-pandemic psychiatric disorders |                  | Individuals with pre-pandemic psychiatric disorders | Individuals without pre-pandemic psychiatric disorders |                  |
| <b>Any psychiatric disorder</b> | 310/50809 (0.61%)                                   | 967/370205 (0.26%)                                     | 1.59 (1.38-1.84) | 259/50809 (0.51%)                                   | 796/370205 (0.22%)                                     | 1.56 (1.33-1.83) | 103/50809 (0.20%)                                   | 220/370205 (0.06%)                                     | 2.01 (1.54-2.63) |
| <b>Depression</b>               | 165/22352 (0.74%)                                   | 1112/398662 (0.28%)                                    | 1.82 (1.53-2.17) | 132/22352 (0.59%)                                   | 923/398662 (0.23%)                                     | 1.72 (1.42-2.08) | 57/22352 (0.26%)                                    | 266/398662 (0.07%)                                     | 2.63 (1.94-3.55) |
| <b>Anxiety</b>                  | 117/16573 (0.71%)                                   | 1160/404441 (0.29%)                                    | 1.78 (1.46-2.17) | 97/16573 (0.59%)                                    | 958/404441 (0.24%)                                     | 1.76 (1.42-2.18) | 33/16573 (0.20%)                                    | 290/404441 (0.07%)                                     | 1.89 (1.30-2.74) |
| <b>Stress-related disorder</b>  | 6/872 (0.69%)                                       | 1271/420142 (0.30%)                                    | 1.37 (0.61-3.08) | 6/872 (0.69%)                                       | 1049/420142 (0.25%)                                    | 1.64 (0.73-3.71) | 2/872 (0.23%)                                       | 321/420142 (0.08%)                                     | 2.09 (0.51-8.57) |
| <b>Substance misuse</b>         | 145/23620 (0.61%)                                   | 1132/397394 (0.28%)                                    | 1.28 (1.04-1.58) | 127/23620 (0.54%)                                   | 928/397394 (0.23%)                                     | 1.32 (1.06-1.65) | 43/23620 (0.18%)                                    | 280/397394 (0.07%)                                     | 1.08 (0.74-1.60) |
| <b>Psychotic disorder</b>       | 16/1431 (1.12%)                                     | 1261/419583 (0.30%)                                    | 2.00 (1.21-3.32) | 11/1431 (0.77%)                                     | 1044/419583 (0.25%)                                    | 1.61 (0.88-2.94) | 6/1431 (0.42%)                                      | 317/419583 (0.08%)                                     | 2.96 (1.30-6.76) |

Data are n/N (%), unless otherwise specified. ORs (95% CI) were derived from logistic regression models, adjusted for birth year, sex, race or ethnicity, Townsend deprivation index, educational attainment, annual household income, body-mass index, smoking status, and history of chronic cardiac disease, diabetes, chronic pulmonary disease, chronic kidney disease, and asthma. OR=odds ratio.

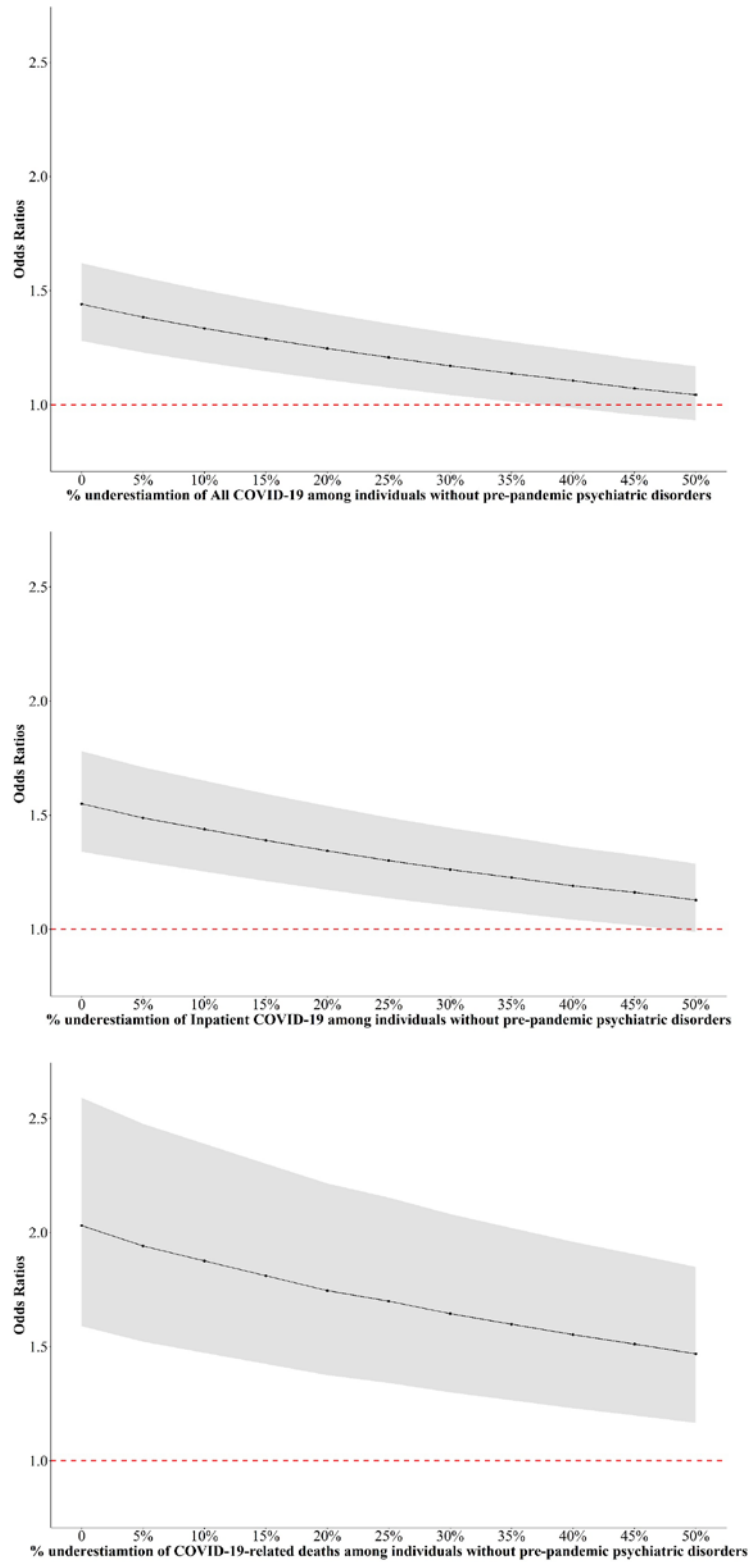

**Supplementary Figure 1 Changes of odd ratios with 95% confidence intervals<sup>a</sup>, by assuming 5-50% underestimation of the studied outcomes among individuals without pre-pandemic psychiatric disorders**

<sup>a</sup> Odds ratios with 95% confidence intervals were derived from logistic regression models, adjusted for birth year, sex, race or ethnicity, Townsend deprivation index, educational attainment, annual household income, body-mass index, smoking status, and history of chronic cardiac disease, diabetes, chronic pulmonary disease, chronic kidney disease, and asthma. For certain selected percentage (5-50%, by every 5%), odd ratio and its 95% confidence interval were the average values of these estimates calculated based on 100 datasets with certain percentage of misclassified cases randomly selected from individuals without pre-pandemic psychiatric disorders.
